# Supplementary material
Source: Springer Nature journal article supplement (https://www.springermedizin.de/resource/supplementary/12957_2009_621_MOESM1_ESM.pdf/9565352)

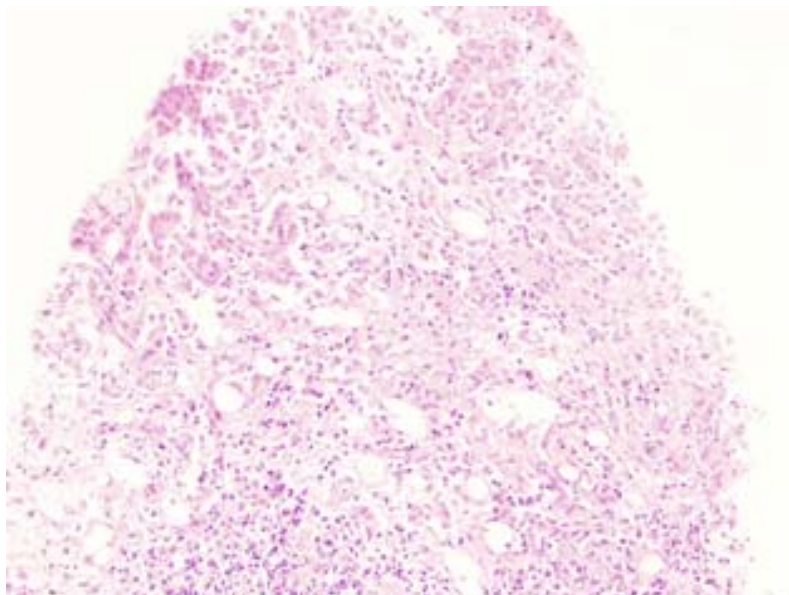

(a)

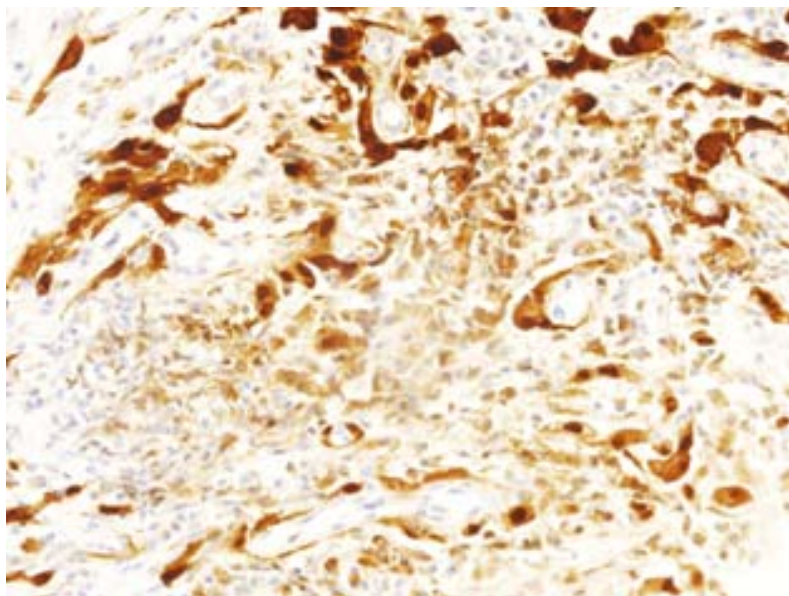

(b)

Supplement: MOESM1 [file 9565352]
